# Supplementary material for: Serum bridging molecules drive candidal invasion of human but not mouse endothelial cells
Source: PubMed Central journal article supplement (PMC9295963; doi:10.1371/journal.ppat.1010681), 2022-07-07
Supplement: ppat.1010681.s001.pdf [file ppat.1010681.s001.pdf]

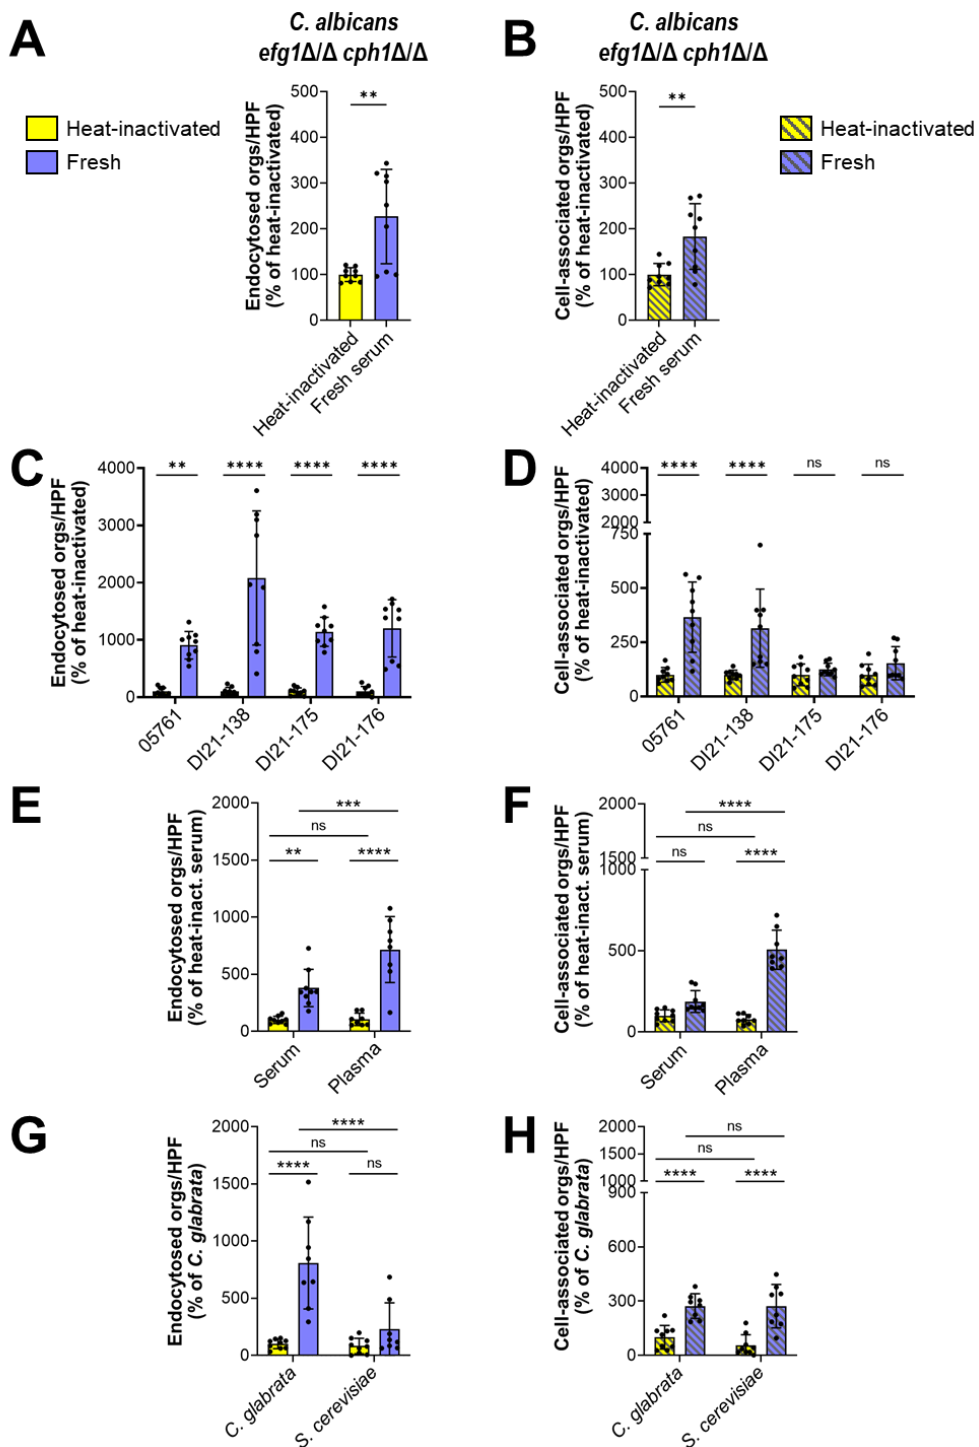

**Fig. S1.** Bridging molecules mediate the endocytosis of live *C. albicans* and *C. glabrata* yeast, but not *S. cerevisiae*. (A and B) Endocytosis (A) and cell-association (B) of live cells of a *C. albicans efg1Δ/Δ cph1Δ/Δ* mutant by human umbilical vein endothelial cells. (C and D) Effects of fresh and heat-inactivated serum on the endocytosis (C) and cell-association of the indicated strains of live *C. glabrata*. (E and F) Effects of fresh human serum and plasma on the endocytosis (E) and cell-association (F) of live *C. glabrata*. (G and H) Endocytosis (G) and cell-association (H) of live *C. glabrata* and *S. cerevisiae*. Results are the mean  $\pm$  SD of 3 independent experiments, each performed in triplicate. Orgs/HPF, organisms per high-power field; ns, not significant; \*\* $P < 0.01$ , \*\*\* $P < 0.001$ , \*\*\*\* $P < 0.0001$  by Student's t-test (A and B) or ANOVA with the Dunnett's test for multiple comparisons (C-H).
