# Supplementary material for: Serum bridging molecules drive candidal invasion of human but not mouse endothelial cells
Source: PubMed Central journal article supplement (PMC9295963; doi:10.1371/journal.ppat.1010681), 2022-07-07
Supplement: ppat.1010681.s002.pdf [file ppat.1010681.s002.pdf]

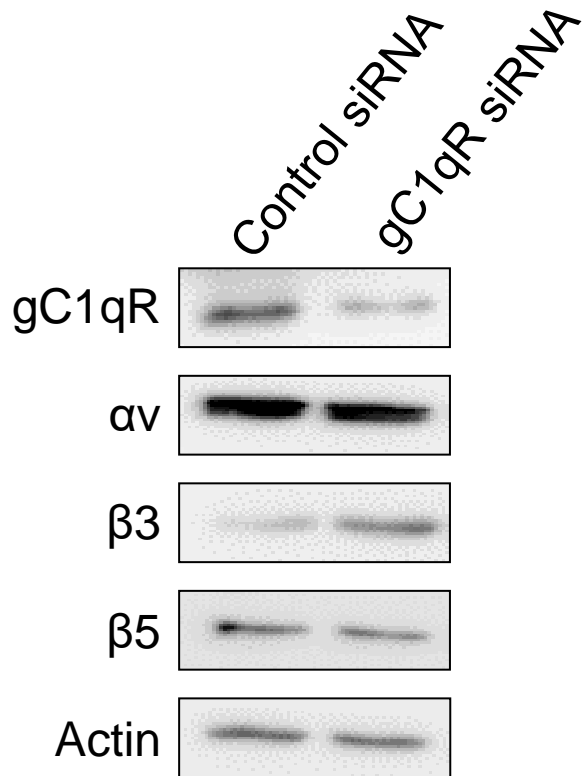

**Fig. S2.** Western blot showing effects of gC1qR siRNA on the levels of the indicated human endothelial cell proteins.
