# Supplementary material for: Serum bridging molecules drive candidal invasion of human but not mouse endothelial cells
Source: PubMed Central journal article supplement (PMC9295963; doi:10.1371/journal.ppat.1010681), 2022-07-07
Supplement: ppat.1010681.s004.pdf [file ppat.1010681.s004.pdf]

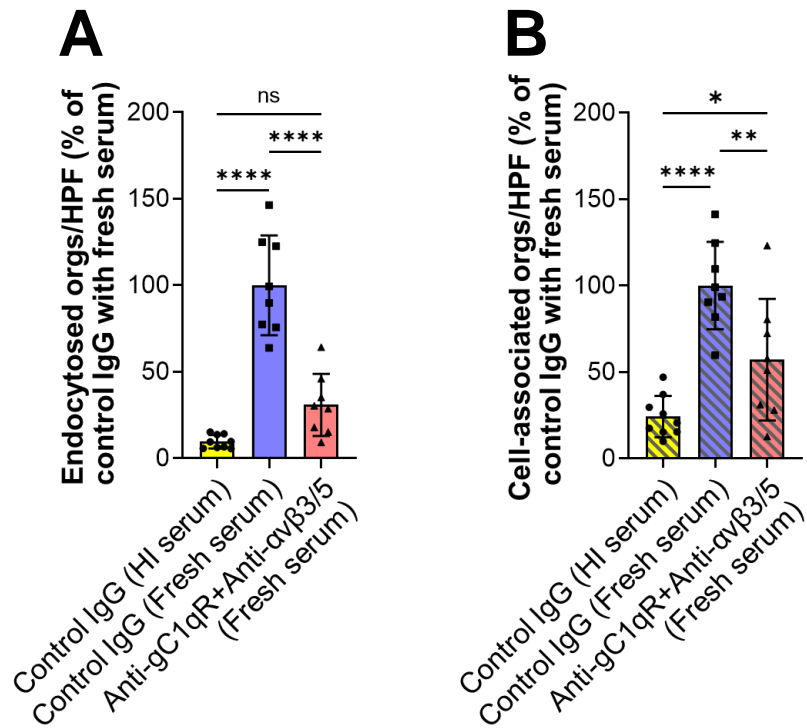

**Fig. S4.** (A and B) Combined effects of antibodies against gC1qR, integrin  $\alpha$ v $\beta$ 3, and integrin  $\alpha$ v $\beta$ 5 on the endocytosis (A) and cell association (B) of *C. glabrata*. Data are the mean  $\pm$  SD of 3 experiments each performed in triplicate. HI, heat-inactivated; Orgs/HPF, organisms per high power field; ns, not significant; \*\* $P < 0.01$ ; \*\*\*\* $P < 0.0001$  by ANOVA with the Dunnett's test for multiple comparisons.
