# Supplementary material for: Serum bridging molecules drive candidal invasion of human but not mouse endothelial cells
Source: PubMed Central journal article supplement (PMC9295963; doi:10.1371/journal.ppat.1010681), 2022-07-07
Supplement: ppat.1010681.s006.pdf [file ppat.1010681.s006.pdf]

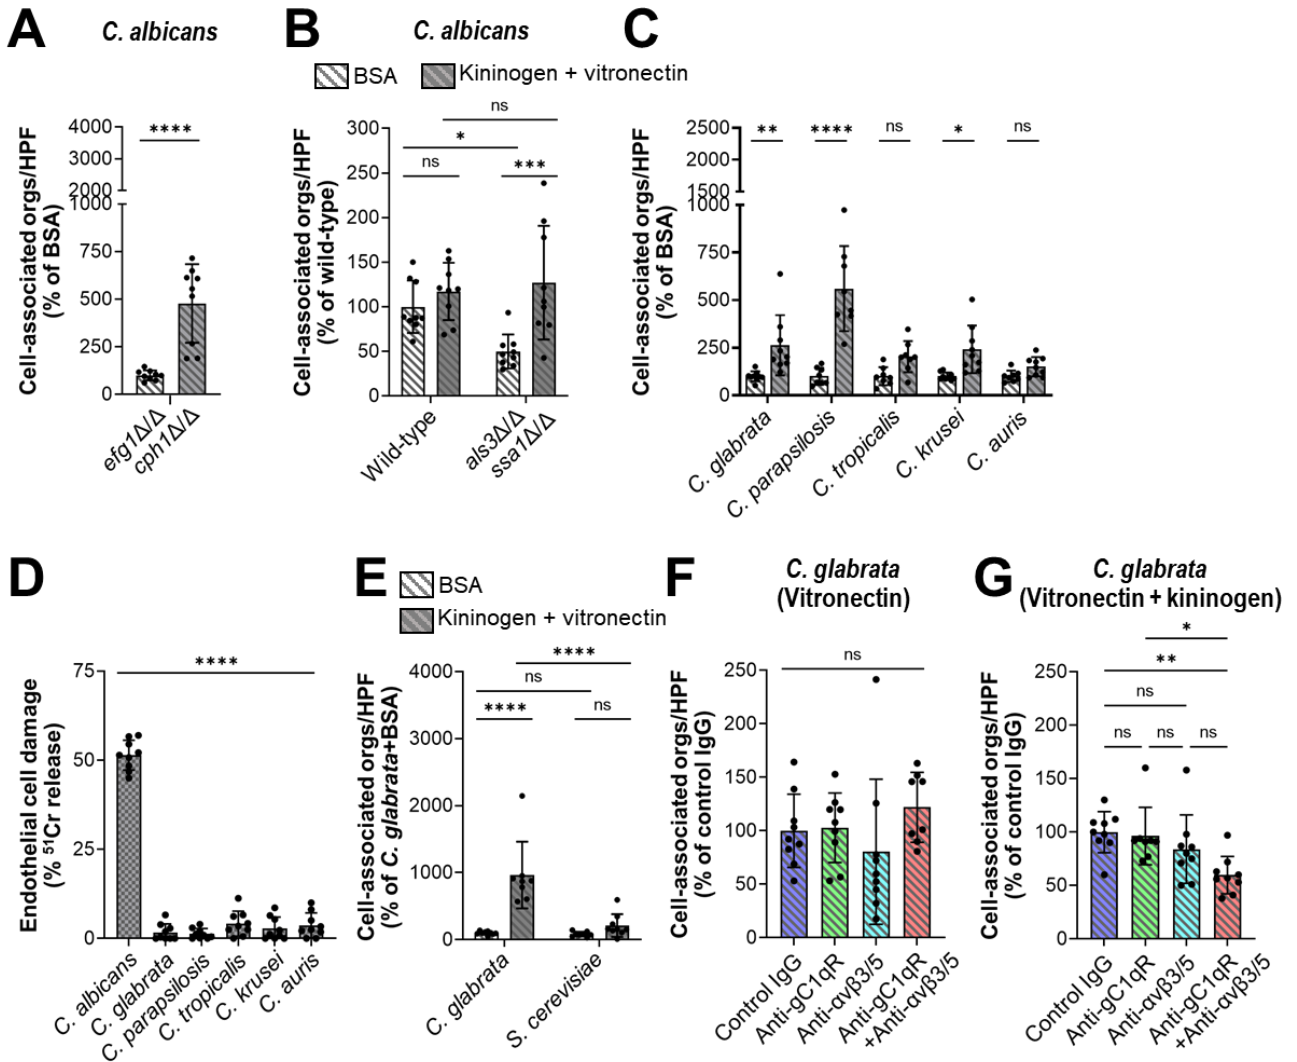

**Fig. S6.** Kininogen and vitronectin interact with gC1qR and  $\alpha v$  integrins to induce adherence. (A and B) Effects of BSA or kininogen and vitronectin on the endocytosis of the indicated strains of *C. albicans*. (C) Kininogen and vitronectin increase cell-association (adherence) of the indicated *Candida* spp. (D) Endothelial cell damage caused by the cells of the indicated strains that had been coated with kininogen and vitronectin. (E) Kininogen and vitronectin do not enhance the cell-association of *S. cerevisiae*. (F and G) Inhibition of cell-association of *C. glabrata* coated with either vitronectin alone (F) or vitronectin and kininogen (G) by antibodies against gC1qR (clone 74.5.2) and/or integrins  $\alpha v\beta 3$  and  $\alpha v\beta 5$ . Data are the mean  $\pm$  SD of 3 experiments each performed in triplicate. Orgs/HPF, organisms per high power field; ns, not significant; \* $P < 0.05$ , \*\* $P < 0.01$ , \*\*\* $P < 0.001$ , \*\*\*\* $P < 0.0001$  by Student's t-test (A) or ANOVA with the Dunnett's test for multiple comparisons (B-G).
