# Supplementary material for: Serum bridging molecules drive candidal invasion of human but not mouse endothelial cells
Source: PubMed Central journal article supplement (PMC9295963; doi:10.1371/journal.ppat.1010681), 2022-07-07
Supplement: ppat.1010681.s007.pdf [file ppat.1010681.s007.pdf]

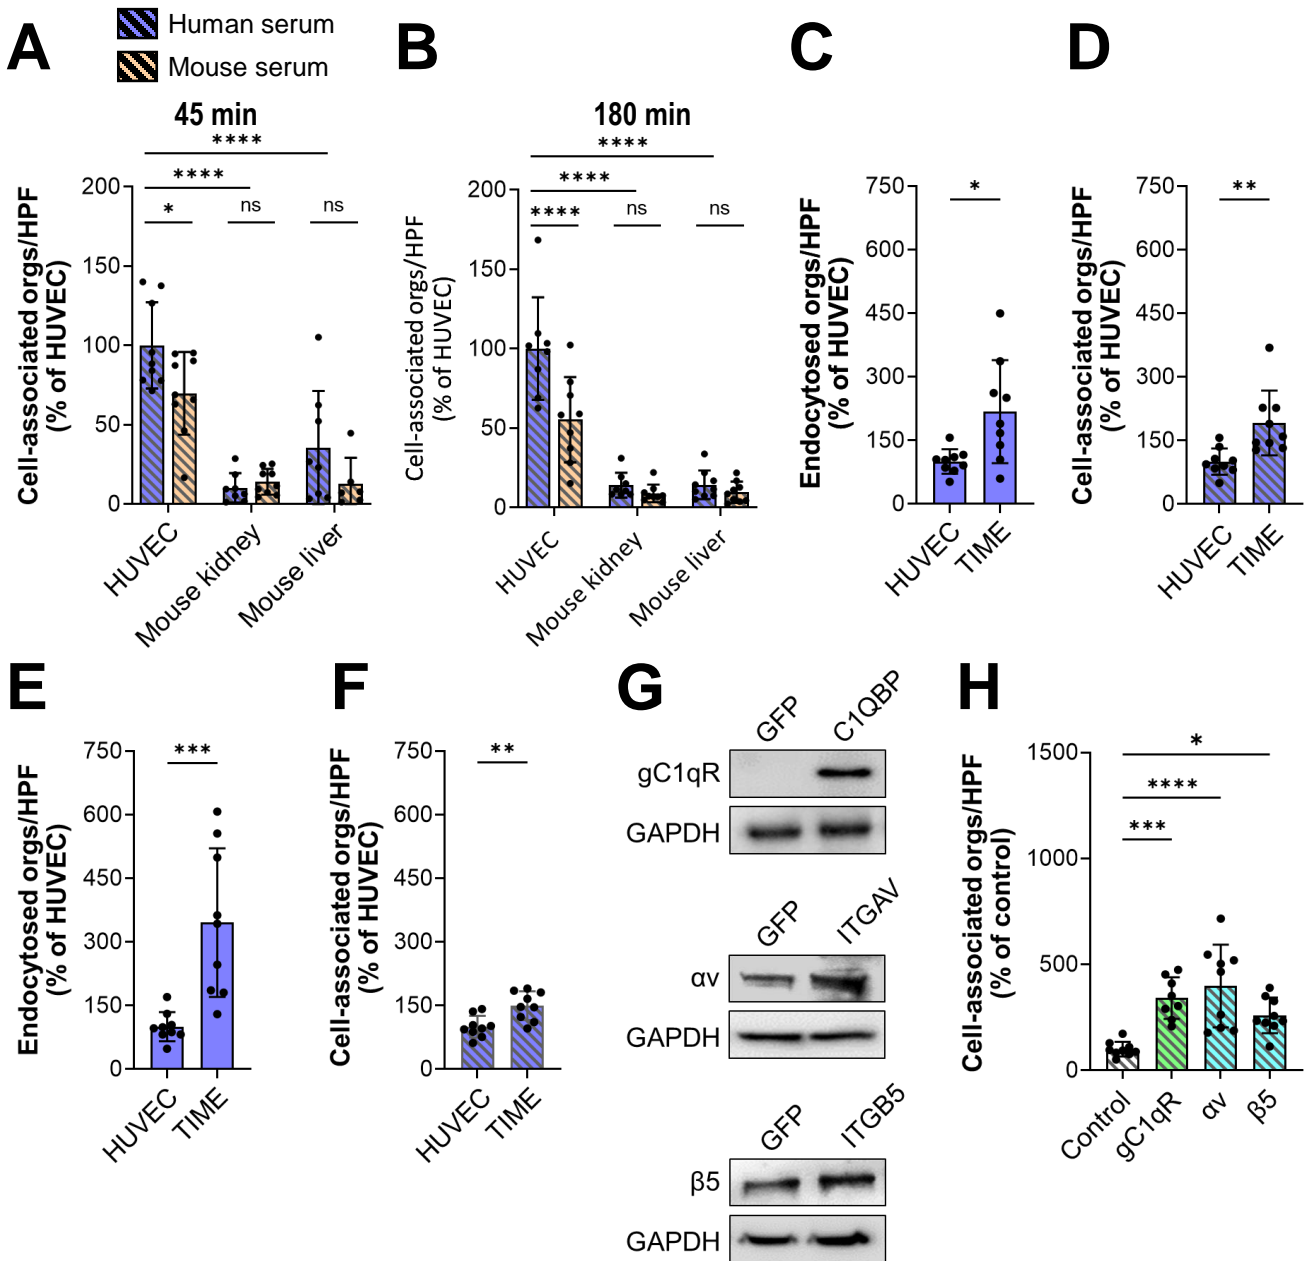

**Fig. S7.** Mouse endothelial cells poorly support bridging molecule-mediated adherence. (A and B) Cell-association of *C. glabrata* coated with either human or mouse serum by the indicated endothelial cells after 45 min (A) and 180 min (B). (C-F) Endocytosis (C and E) and cell-association (D and F) of *C. glabrata* coated with fresh human serum (C and D) or kininogen and vitronectin (E and F) by the indicated endothelial cells. (G) Western blot showing the protein levels of gC1qR, integrin  $\alpha$ v and integrin  $\beta$ 5 in mouse liver endothelial cells transduced with lentivirus containing the indicated human genes. gC1qR was detected with monoclonal antibody 60.11, which only binds to the human protein. The integrins were detected with antibodies that recognize both human and mouse proteins. (H) Cell-association of *C. glabrata* coated with fresh human serum by mouse liver endothelial cells expressing human gC1qR, integrin  $\alpha$ v, or integrin  $\beta$ 5. Data in (A-F and H) are the mean  $\pm$  SD of 3 experiments each performed in triplicate. HUVEC, human umbilical vein endothelial cell; orgs/HPF, organisms per high power field; ns, not significant; TIME, Tert-immortalized microvascular endothelial cells; \* $P$  < 0.05, \*\* $P$  < 0.01, \*\*\* $P$  < 0.001, \*\*\*\* $P$  < 0.0001 by ANOVA with the Dunnett's test for multiple comparisons (A, B and H) or the Student's t-test (C-F).
