# Supplementary material for: Serum bridging molecules drive candidal invasion of human but not mouse endothelial cells
Source: PubMed Central journal article supplement (PMC9295963; doi:10.1371/journal.ppat.1010681), 2022-07-07
Supplement: ppat.1010681.s008.pdf [file ppat.1010681.s008.pdf]

Supplementary Table 1. Fungal strains used in this work.

| Organism                    | Strain                 | Relevant Genotype                                                                                                                                      | Source/Reference                                                                          |
|-----------------------------|------------------------|--------------------------------------------------------------------------------------------------------------------------------------------------------|-------------------------------------------------------------------------------------------|
| <i>Candida albicans</i>     | SC5314                 | Wild-type                                                                                                                                              | [1]                                                                                       |
| <i>Candida albicans</i>     | DIC185                 | <i>ura3Δ::λimm434/ura3Δ::λimm434::URA3-IRO1</i><br><i>arg4::hisG/arg4::hisG::pARG4</i><br><i>his1::hisG/his1::hisG::pHIS1</i>                          | [2]                                                                                       |
| <i>Candida albicans</i>     | CAI4-URA               | <i>ura3Δ::imm434/ura3Δ::imm434::URA3</i>                                                                                                               | [3]                                                                                       |
| <i>Candida albicans</i>     | DSC10                  | <i>efg1Δ::hisG/efg1Δ::hisG</i><br><i>ura3Δ::λimm434/ura3Δ::λimm434::URA3-IRO1</i>                                                                      | This study                                                                                |
| <i>Candida albicans</i>     | <i>ssa1Δ/Δ-als3Δ/Δ</i> | <i>ura3Δ::λimm434/ura3Δ::λimm434</i><br><i>ssa1Δ::FRT/ssa1Δ::FRT</i><br><i>SSA2/ssa2Δ::FRT</i><br><i>als3Δ/als3Δ::NAT1</i><br><i>RPS10/rps10::URA3</i> | [4]                                                                                       |
| <i>Candida auris</i>        | CAU-09                 | Wild-type                                                                                                                                              | [5]                                                                                       |
| <i>Candida glabrata</i>     | 05-761                 | Wild-type                                                                                                                                              | [6]                                                                                       |
| <i>Candida glabrata</i>     | DI121-138              | Wild-type                                                                                                                                              | Fungus Testing Laboratory at the University of Texas Health Science Center at San Antonio |
| <i>Candida glabrata</i>     | DI121-175              | Wild-type                                                                                                                                              | Fungus Testing Laboratory at the University of Texas Health Science Center at San Antonio |
| <i>Candida glabrata</i>     | DI121-176              | Wild-type                                                                                                                                              | Fungus Testing Laboratory at the University of Texas Health Science Center at San Antonio |
| <i>Candida krusei</i>       | 2333                   | Wild-type                                                                                                                                              | Fungus Testing Laboratory at the University of Texas Health Science Center at San Antonio |
| <i>Candida parapsilosis</i> | 1184                   | Wild-type                                                                                                                                              | Fungus Testing Laboratory at the University of Texas Health Science Center at San Antonio |

|                                 |          |                                                                                |                                                                                           |
|---------------------------------|----------|--------------------------------------------------------------------------------|-------------------------------------------------------------------------------------------|
| <i>Candida tropicalis</i>       | DI13-280 | Wild-type                                                                      | Fungus Testing Laboratory at the University of Texas Health Science Center at San Antonio |
| <i>Saccharomyces cerevisiae</i> | AMP188   | <i>MAT<math>\alpha</math> lys-23 ade2 ura2-49</i> ( $\Sigma$ 1278b background) | [7]                                                                                       |

## References

1. Jones T, Federspiel NA, Chibana H, Dungan J, Kalman S, Magee BB, et al. The diploid genome sequence of *Candida albicans*. Proc Natl Acad Sci USA. 2004;101(19):7329-34. PubMed PMID: 15123810.
2. Phan QT, Eng DK, Mostowy S, Park H, Cossart P, Filler SG. Role of endothelial cell septin 7 in the endocytosis of *Candida albicans*. MBio. 2013;4(6):00542-13.
3. Sanchez AA, Johnston DA, Myers C, Edwards JE, Jr., Mitchell AP, Filler SG. Relationship between *Candida albicans* virulence during experimental hematogenously disseminated Infection and endothelial cell damage In vitro. Infect Immun. 2004;72(1):598-601. PubMed PMID: 14688143.
4. Sun JN, Solis NV, Phan QT, Bajwa JS, Kashleva H, Thompson A, et al. Host cell invasion and virulence mediated by *Candida albicans* Ssa1. PLoS Pathog. 2010;6(11):e1001181. PubMed PMID: 21085601.
5. Mamouei Z, Alqarihi A, Singh S, Xu S, Mansour MK, Ibrahim AS, et al. Alexidine dihydrochloride has broad-spectrum activities against diverse fungal pathogens. mSphere. 2018;3(5). Epub 2018/11/02. doi: 10.1128/mSphere.00539-18. PubMed PMID: 30381356; PubMed Central PMCID: PMC6211222.
6. Wiederhold NP, Najvar LK, Bocanegra R, Molina D, Olivo M, Graybill JR. In vivo efficacy of anidulafungin and caspofungin against *Candida glabrata* and association with in vitro potency in the presence of sera. Antimicrob Agents Chemother. 2007;51(5):1616-20.
7. Mitchell AP, Magasanik B. Three regulatory systems control production of glutamine synthetase in *Saccharomyces cerevisiae*. Mol Cell Biol. 1984;4(12):2767-73. Epub 1984/12/01. doi: 10.1128/mcb.4.12.2767. PubMed PMID: 6152013; PubMed Central PMCID: PMC6211222.
